# Supplementary material for: Artificial Grassland Had Higher Water Use Efficiency in Year with Less Precipitation in the Agro-Pastoral Ecotone
Source: MDPI journal article supplement (doi:10.3390/plants12061239), 2023-03-09
Supplement: s1 [file s1]

**Table S1.** Results of multi-factor ANOVA analysis showing the effects of land use type(T), soil layer(L) and year(Y) and their interactions on soil physical and chemical properties

|                                 | T      |      | L      |      | Y      |     | T×L  |      | T×Y   |      | L×Y   |      | T×L×Y |      |
|---------------------------------|--------|------|--------|------|--------|-----|------|------|-------|------|-------|------|-------|------|
|                                 | F      | P    | F      | P    | F      | P   | F    | P    | F     | P    | F     | P    | F     | P    |
| SWC                             | 27.06  | ***  | 197.86 | ***  | 511.65 | *** | 2.40 | 0.05 | 13.27 | ***  | 21.43 | ***  | 2.17  | 0.08 |
| Olsen-P                         | 20.44  | ***  | 19.27  | ***  | 15.85  | *** | 1.83 | 0.13 | 1.58  | 0.21 | 0.58  | 0.56 | 0.58  | 0.68 |
| SOC                             | 56.41  | ***  | 25.40  | ***  | 12.44  | **  | 3.55 | **   | 11.82 | ***  | 6.13  | **   | 0.65  | 0.63 |
| TC                              | 9.41   | ***  | 0.48   | 0.62 | 7.01   | **  | 1.09 | 0.36 | 2.83  | 0.06 | 0.04  | 0.96 | 0.08  | 0.99 |
| TN                              | 37.65  | ***  | 8.55   | ***  | 9.27   | **  | 5.13 | **   | 5.57  | **   | 0.22  | 0.80 | 0.65  | 0.63 |
| TP                              | 2.46   | 0.09 | 7.38   | **   | 9.82   | **  | 3.01 | *    | 2.96  | 0.06 | 0.47  | 0.63 | 0.47  | 0.76 |
| NH <sub>4</sub> <sup>+</sup> -N | 3.50   | *    | -      | -    | 4.28   | *   | -    | -    | 1.89  | 0.17 | -     | -    | -     | -    |
| NO <sub>3</sub> <sup>-</sup> -N | 107.88 | ***  | -      | -    | 82.57  | *** | -    | -    | 22.15 | ***  | -     | -    | -     | -    |
| Available N                     | 109.87 | ***  | -      | -    | 85.12  | *** | -    | -    | 23.04 | ***  | -     | -    | -     | -    |

SWC: soil moisture content, Olsen-P: soil available phosphorus content, SOC: Soil organic carbon content, TC: soil total carbon content, TN: Soil total nitrogen content, TP: soil total phosphorus content, NH<sub>4</sub><sup>+</sup>-N: soil ammonium nitrogen content, NO<sub>3</sub><sup>-</sup>-N: soil nitrate nitrogen content, Available N: soil available nitrogen content. The asterisk indicates a significant difference between two years for the same land use type and soil layer. \*, \*\*, \*\*\* represent  $P < 0.05$ ,  $P < 0.01$ ,  $P < 0.001$ , respectively.

**Table S2.** Results of two-way ANOVA analysis showing the effects of land use type(T) and year(Y) and their interaction on soil moisture conditions.

|                                   | T    |      | Y      |      | T×Y  |   |
|-----------------------------------|------|------|--------|------|------|---|
|                                   | F    | P    | F      | P    | F    | P |
| Initial soil water storage        | 0.02 | 0.98 | 5.22   | *    | 4.91 | * |
| Final soil water storage          | 2.15 | 0.13 | 19.80  | ***  | 4.81 | * |
| Evapotranspiration                | 1.70 | 0.20 | 518.35 | ***  | 4.68 | * |
| Soil water storage deficit degree | 1.28 | 0.29 | 19.47  | ***  | 4.61 | * |
| Soil water balance                | 1.70 | 0.20 | 1.36   | 0.25 | 4.68 | * |

The asterisk indicates a significant difference between two years for the same land use type. \*, \*\*\*, \*\*\* represent  $P < 0.05$ ,  $P < 0.001$ , respectively.

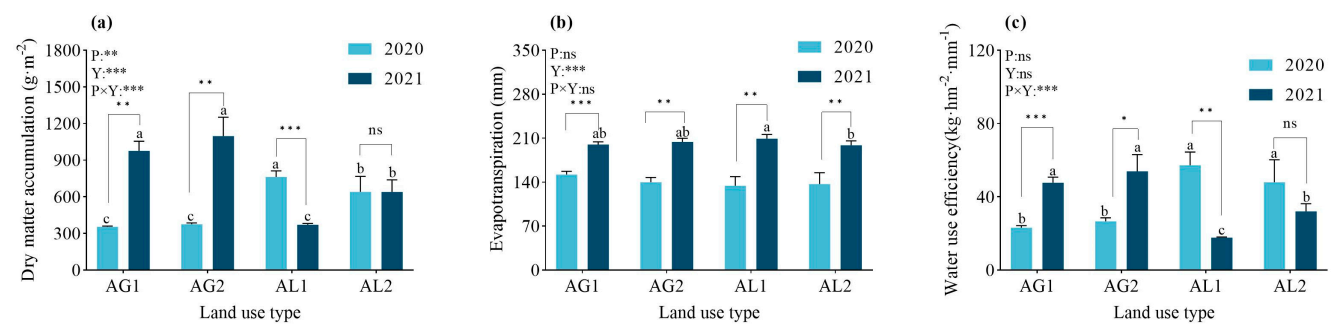

**Figure S1.** Differences of dry matter accumulation(a), evapotranspiration(b), and water use efficiency(c) between different plants in cropland and artificial grassland in 2020-2021. AG1: *Medicago sativa*, AG2: *Bromus inermis*, AL1: *Solanum tuberosum*, AL2: *Avena sativa*. P: plant, Y: year, P×Y: interaction of plant and year. Lowercase letters indicate the significant difference between different plant in the same year ( $P < 0.05$ ). The asterisk indicates a significant difference between two years for the same plant. \*, \*\*, \*\*\* , ns represent  $P < 0.05$ ,  $P < 0.01$ ,  $P < 0.001$ ,  $P > 0.05$ , respectively. Data are shown as mean  $\pm$  s.e.m.
